# Supplementary material
Source: publisher figshare collection journal article supplement (https://karger.figshare.com/ndownloader/files/25595270)
Supplement: Supplementary file 1 [file 25595270]

| Supplementary Table 1 Type of Surgery |  |
| --- | --- |
|  | **N = 436** |
|  |  |
| Type of Surgery, n (%) |  |
| Conventional Breast Conserving Surgery | **95 (21.8)** |
| *Open Surgical Biopsy* | *4 (0.9)* |
| *Conventional Tumorectomy* | *94 (21.6)* |
| Oncoplastic Breast Conserving Surgery+ | **188 (43.1)** |
| *Oncoplastic Tumorectomy* | *9 (2.1)* |
| *Grisotti = B-Mammoplasty* | *6 (1.4)* |
| *Oncoplastic Mastopexy** | *120 (27.5)* |
| *Donut = Benelli = Circumareolar Mastopexy* | *70 (16.1)* |
| *V-Mammoplasty* | *21 (4.8)* |
| *Hemibatwing = Racket Mammoplasty* | *33 (7.6)* |
| *Oncoplastic Reduction Mammoplasty* | *45 (10.3)* |
| Conventional mastectomy | **52 (11.9)** |
| Nipple/Skin sparing mastectomy | **101 (23.2)** |
| *NSM with Implant* | *19 (4.4)* |
| *NSM with Autologous reconstruction* | *36 (8.3)* |
| *SSM with Implant* | *12 (2.8)* |
| *SSM with Autologous reconstruction* | *35 (8.0)* |
| Patients can belong to several or none of the *subgroups*, but only to one of the groups  +Defined by either volume replacement or use of tailored glandular flaps  *Defined by non-oncological skin excision | |
